# Supplementary material for: Verification of the regional atmospheric model CCLM v5.0 with conventional data and lidar measurements in Antarctica
Source: Copernicus journal article supplement (doi:10.5194/gmd-13-1809-2020), 2020-04-06
Supplement: Supplementary file 1 [file gmd-13-1809-2020-supplement.pdf]

Supplement of Geosci. Model Dev., 13, 1809–1825, 2020  
<https://doi.org/10.5194/gmd-13-1809-2020-supplement>  
© Author(s) 2020. This work is distributed under  
the Creative Commons Attribution 4.0 License.

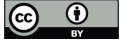

*Supplement of*

## **Verification of the regional atmospheric model CCLM v5.0 with conventional data and lidar measurements in Antarctica**

**Rolf Zentek and Günther Heinemann**

*Correspondence to:* Rolf Zentek (zentek@uni-trier.de)

The copyright of individual parts of the supplement might differ from the CC BY 4.0 License.

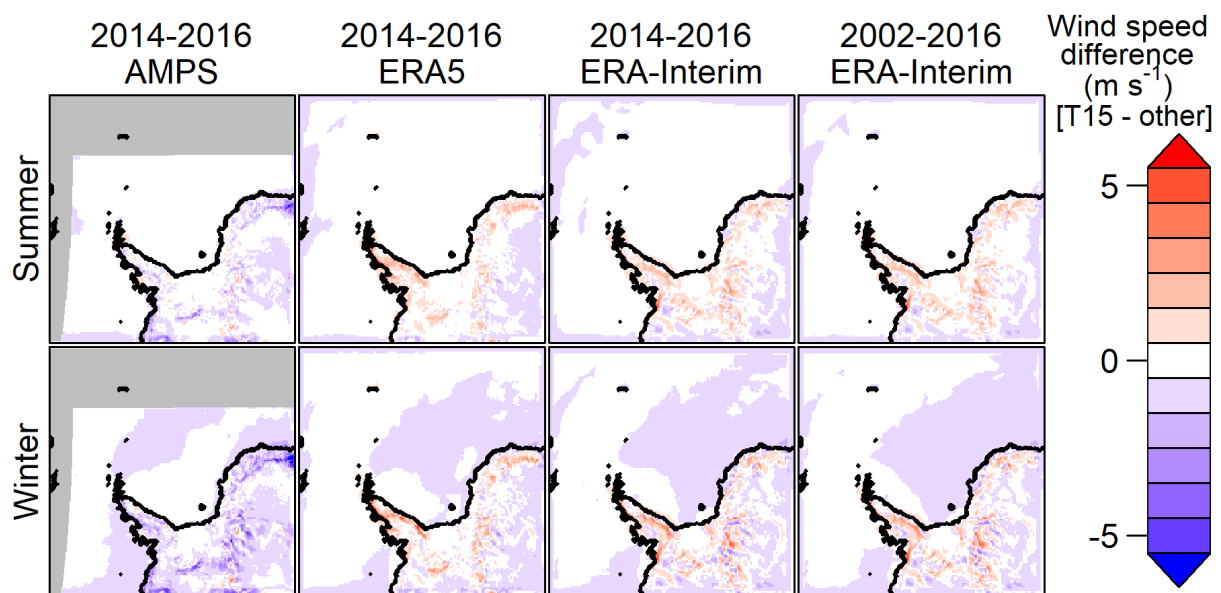

S 1: The 2 m wind speed difference (T15 minus AMPS, ERA5 and ERA-Interim) for the years 2014-2016 / 2002-2016. Summer (October-March, top) and winter (April-September, bottom) are shown separately. The gray area is outside the AMPS-domain

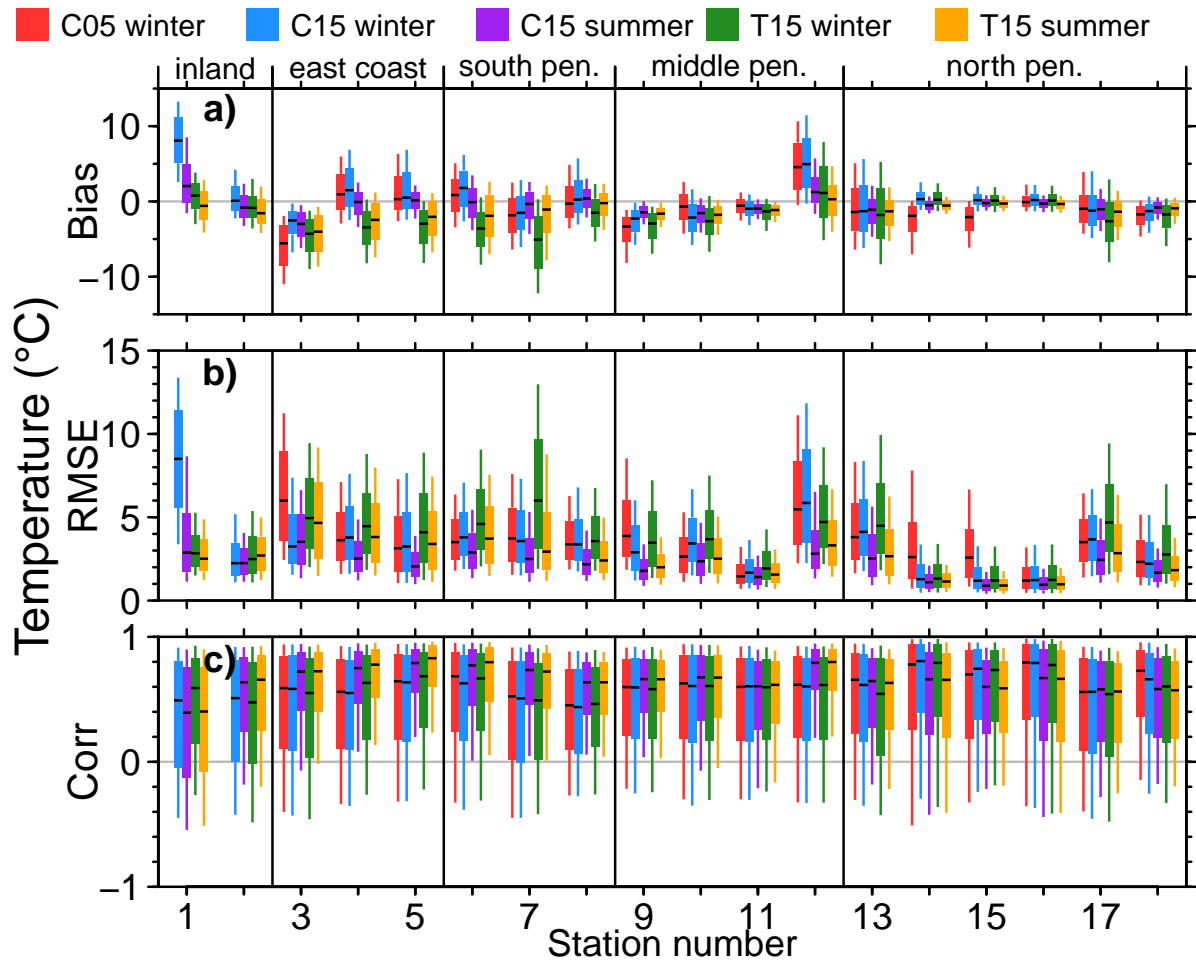

S 2: CCLM (a) 2 m temperature bias, (b) RMSE and (c) correlation for C05, C15 and T15 for different surface stations. Boxes indicate the 25/75% and whiskers the 10/90% quantile; the median is indicated by a black line inside the box. Statistics (bias, RMSE and correlation) are calculated for every day.

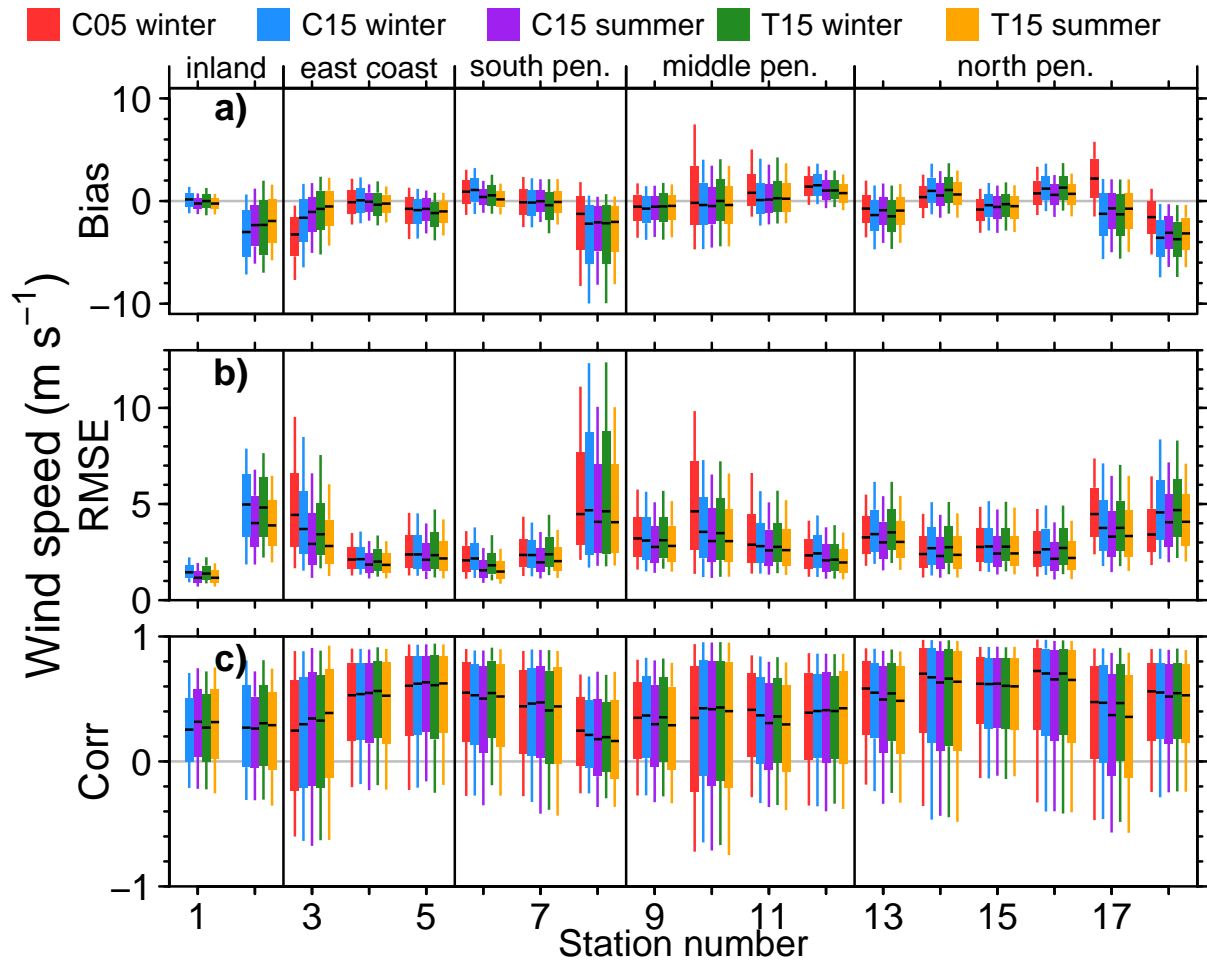

S 3: As Fig. S2 but for 10 m wind speed.

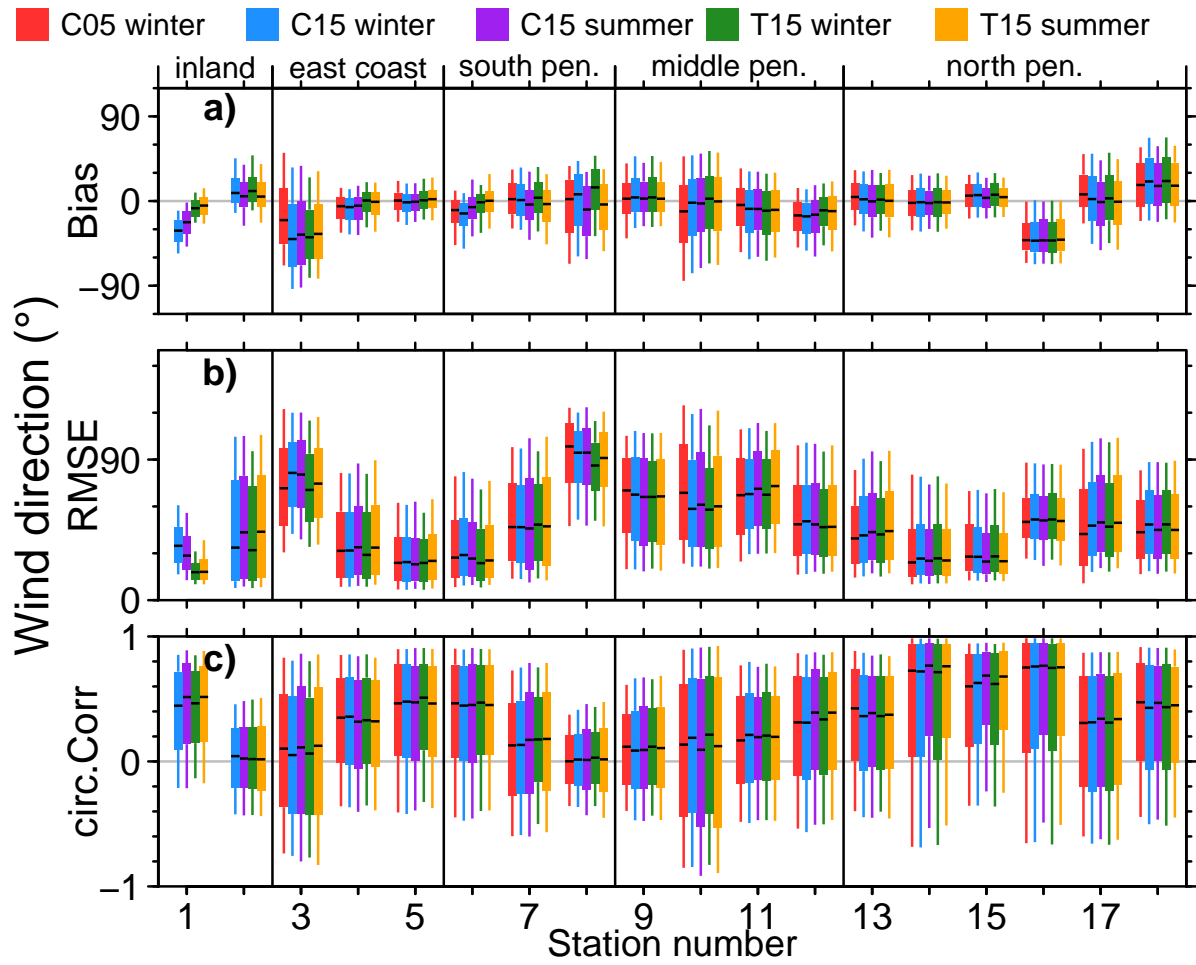

S 4: As Fig. S2 but for 10 m wind direction.

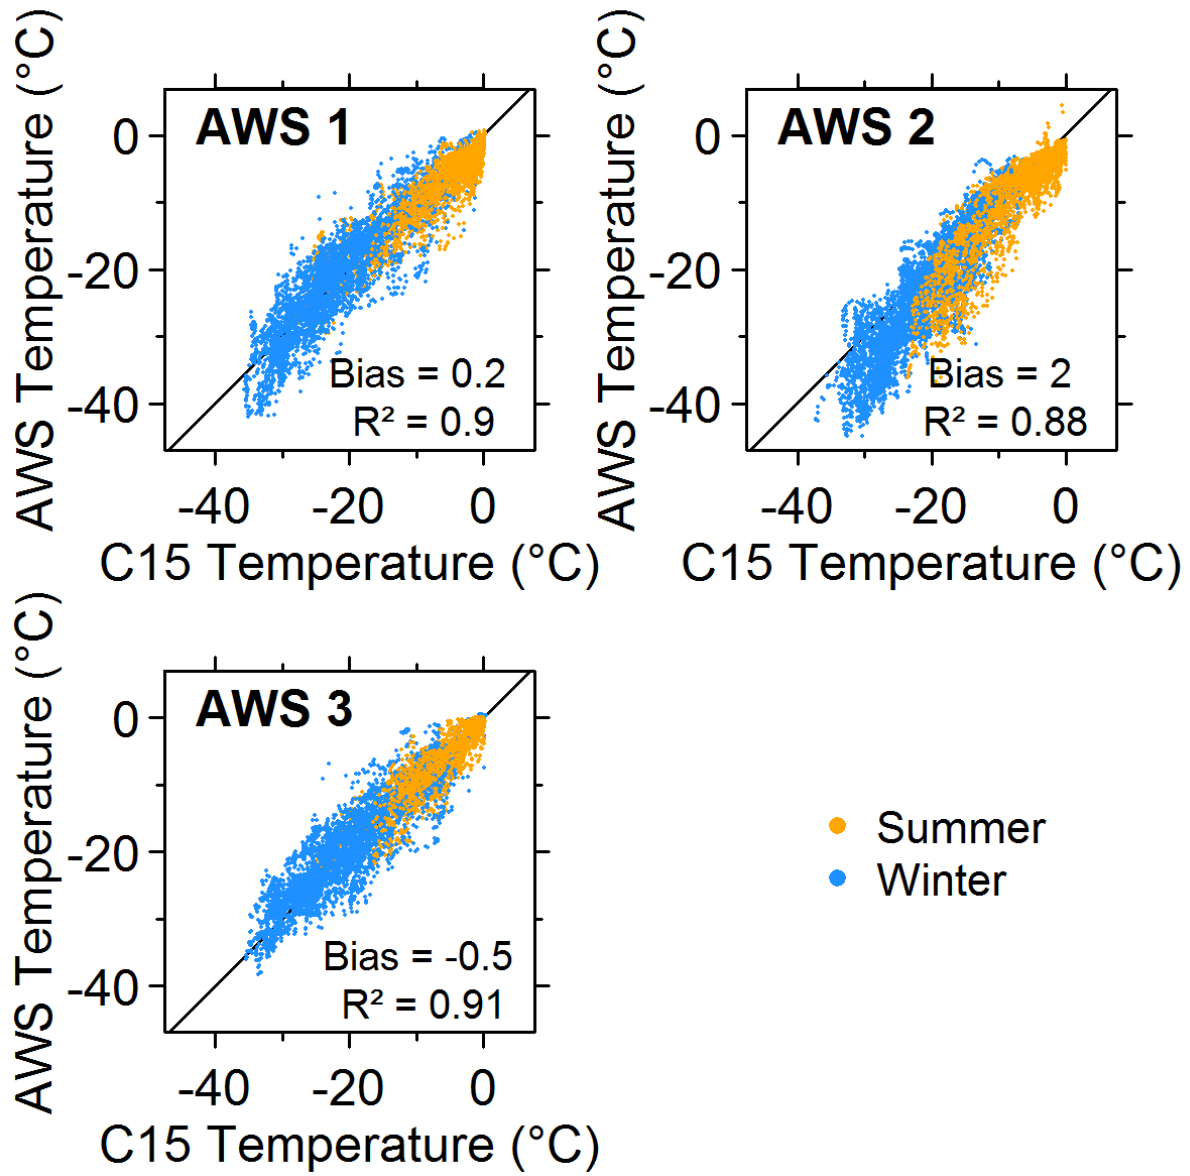

S 5: Temperature of C15 (x-axis) vs Temperature of AWS (y-axis). Values for Summer in orange and for Winter in blue.

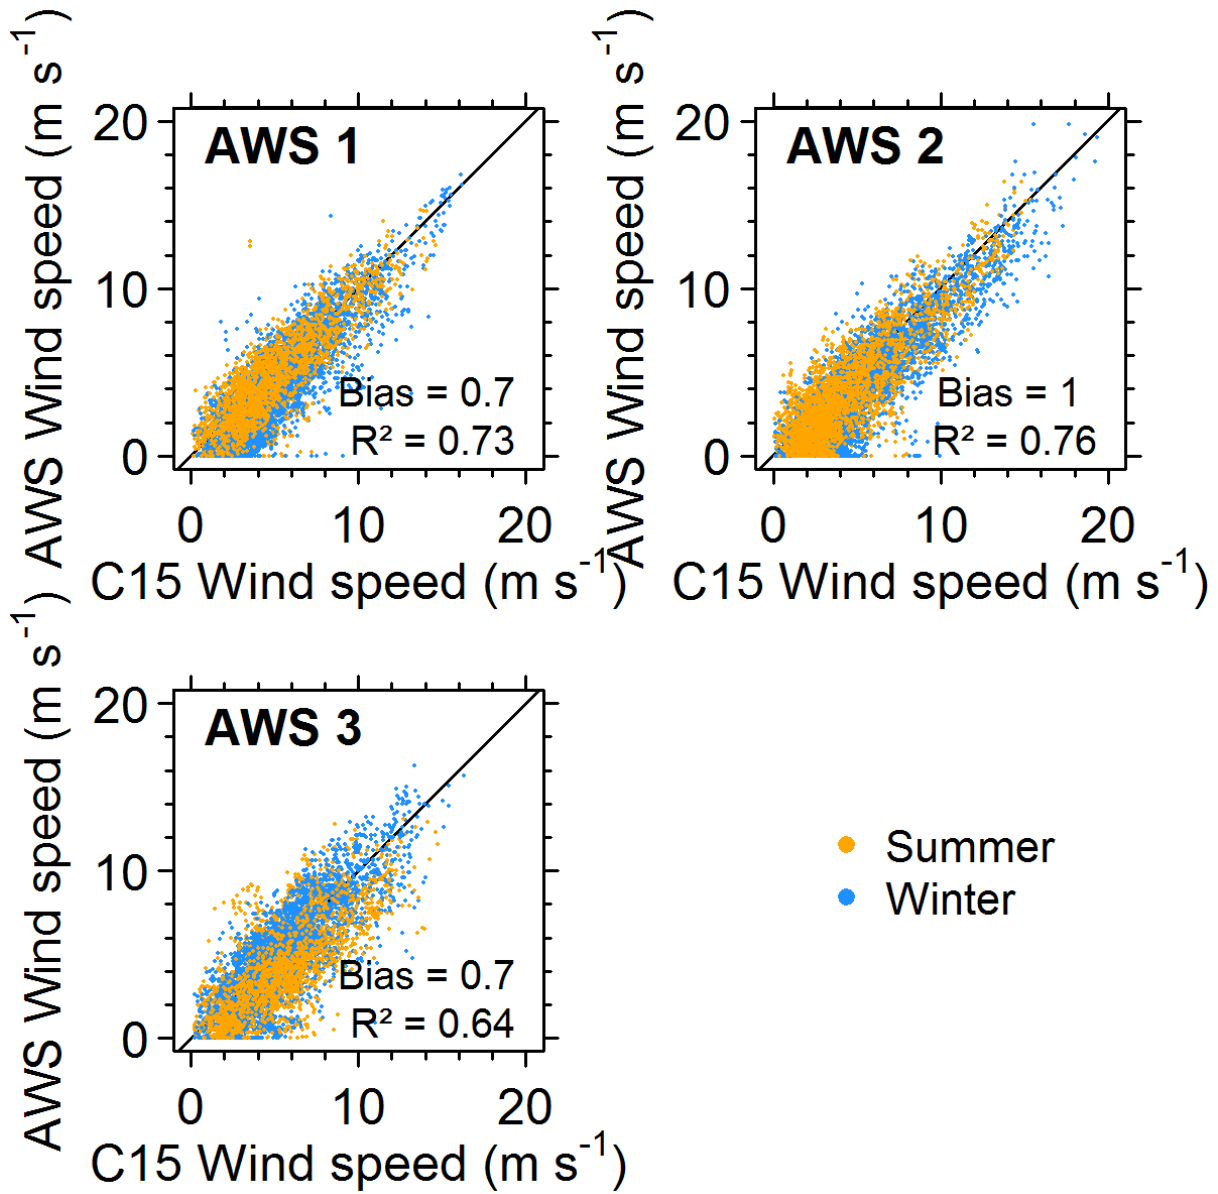

S 6: Like Fig. S5 but for wind speed.

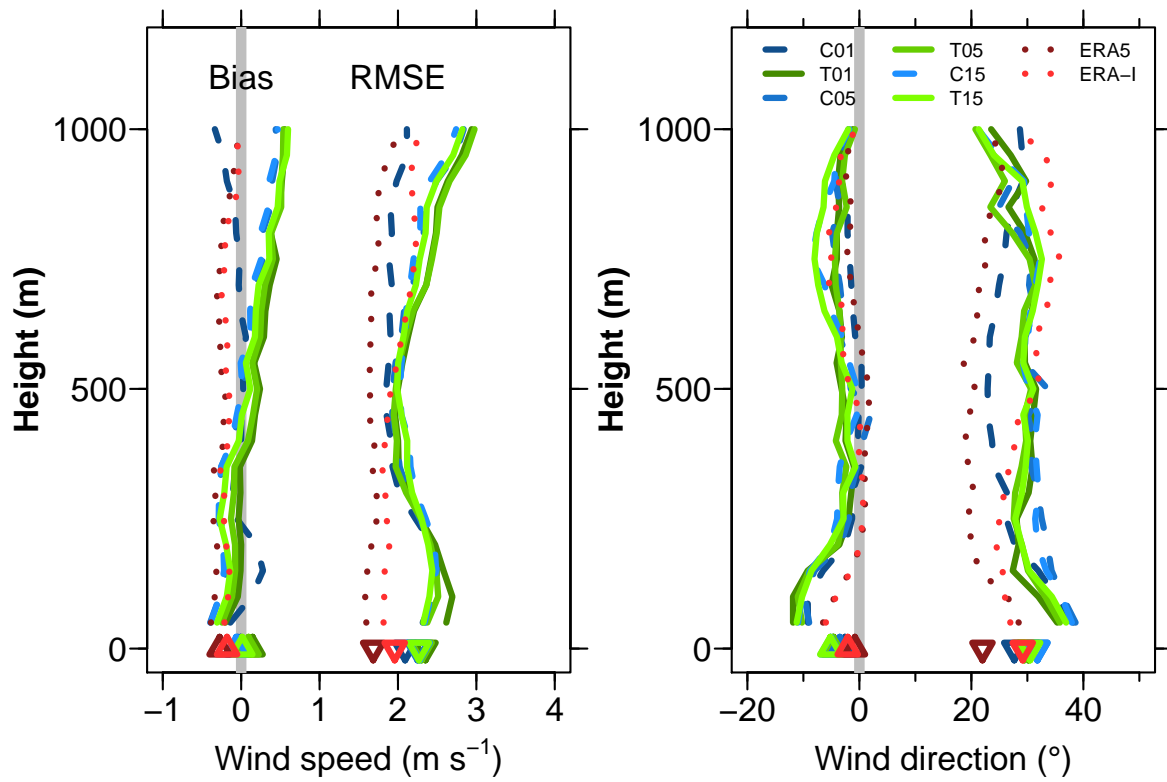

S 7: Bias and RMSE for wind speed (left) and wind direction (right) for CCLM and ERA compared to lidar measurements. Triangles at the bottom indicate the overall bias and RMSE.



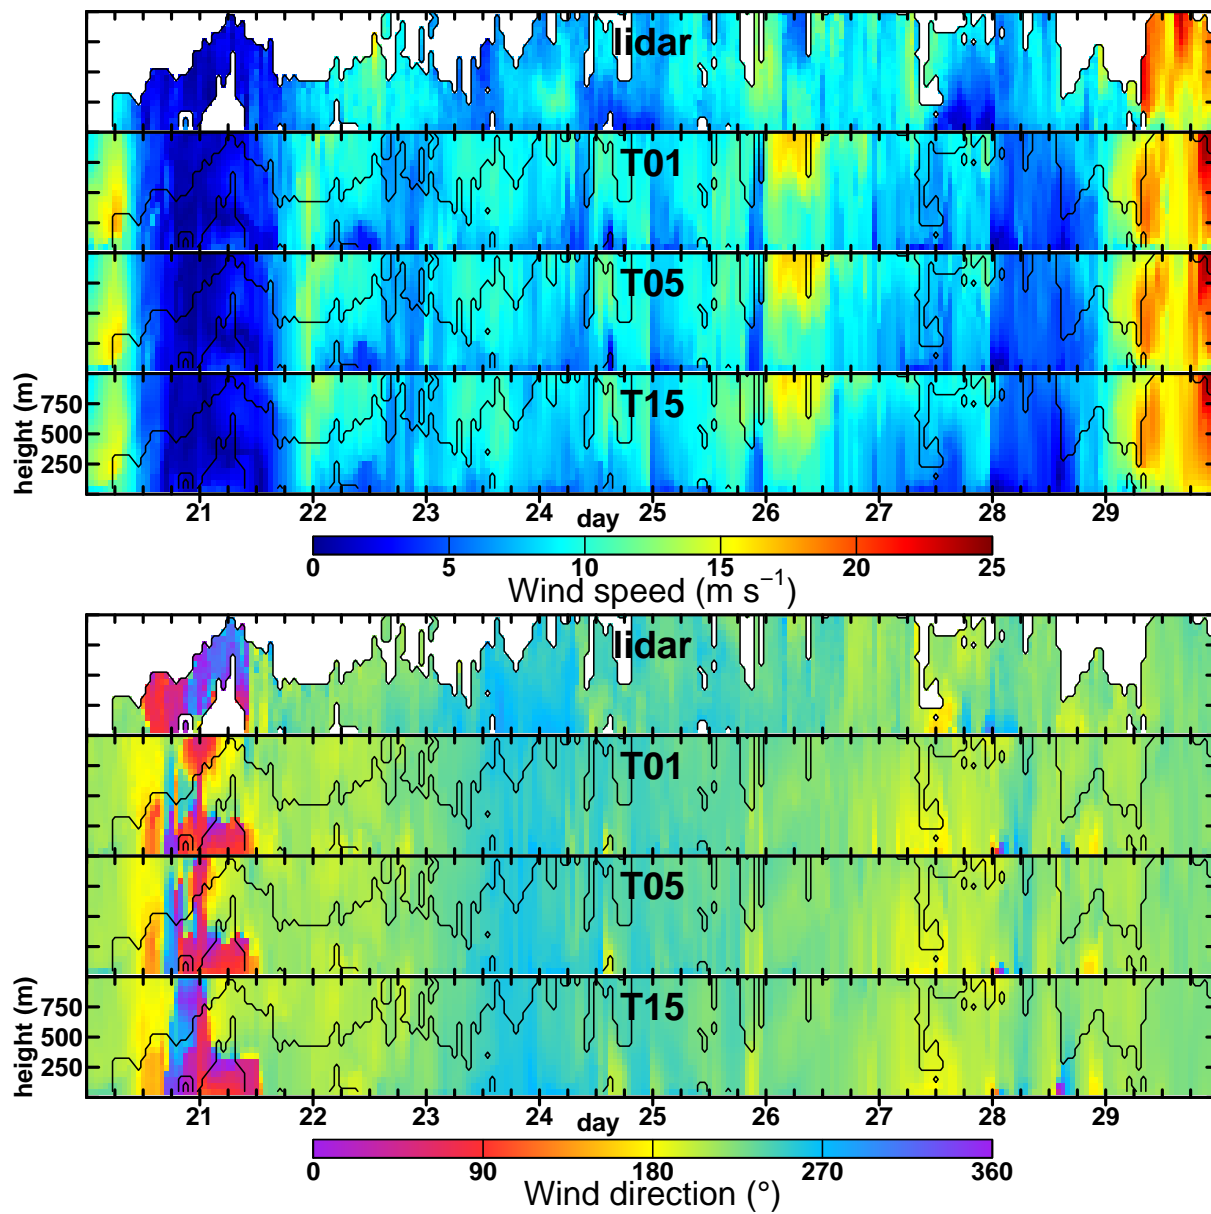

S 8: Time-height cross-sections for wind speed (top) and direction (bottom) for 20 Jan. 00:00 UTC to 30 Jan. 00:00 UTC.
